# Supplementary material for: Stabilisation of an ortho-deprotonated mesityl group within the unusual [{2,4,6-Me3C6H2P}{4,6-Me2C6H2(2-CH2)P}Sn]3? stannate ionElectronic supplementary information (ESI) available: synthesis of 1. See http://www.rsc.org/suppdata/cc/b3/b303390m/
Source: Royal Society of Chemistry journal article supplement (doi:10.1039/b303390m), 2003-01-01
Supplement: b303390m.doc [file b303390m.doc]

**Synthesis of 1**

To a suspension of PhCH2Na (0.57g, 5mmol) in toluene (20ml) at –78oC was added MesPH2 (0.65ml, 4.5mmol). After 5 mins stirring at –78°C the suspension was allowed to warm to room temperature and stirred overnight. An orange suspension was formed, to which was added TMEDA (0.75ml, 5mmol). The mixture was cooled to –78oC and Sn(NMe2)2 (0.31g, 1.5 mmol) in toluene (10ml) was added. After 10 mins stirring at –78°C the suspension was allowed to warm to room temperature and stirred overnight. Some of the toluene (*ca.* 20ml) was removed under vacuum and the solution filtered while hot (50oC). Storage at room temperature (16hrs) gave yellow crystals of **1**. The complex is thermally unstable and decomposes on prolonged storage of the solid at room temperature. Yield 0.20g (first batch, 20%). IR (Nujol, NaCl) **/cm-1= 2756 (CH2) (shifts to 2766 on air-exposure). M.p. becomes deep red at *ca.* 80oC, decomposes to a black solid finally at *ca.* 140oC. 1H NMR (25oC, 400MHz, d8-thf), **= 6.43 (s. broad, 4H, aryl C-H), 3.58 (s. broad, 2H, CH2), 2.31 (s. broad, 6H, *p*-Me), 2.19 (s., 12H, Me2N, tmeda), 2.16 (s. broad, 9H, *o*-Me), 2.06 (s., 4H, CH2, tmeda). 31P NMR (25oC, 161.975MHz, d8-thf), **= -162.1 (d.), -162.8 (d) (2JPP= 44.0Hz). Elemental analysis, found C 53.8, H 7.5, N 5.6, P 8.7, cald. for **1**, C 54.1, H 7.0, N 5.6, P 8.2. 31P NMR studies of the reaction solution (after isolation of crystalline **1**) reveal that **1**, MesPHNa and MesPH2 are the major components remaining.
